# Supplementary material
Source: publisher site journal article supplement (https://www.dovepress.com/article/381807)
Supplement: Supplementary file 1 [file get_supplementary_file.php]

| **Table S1** The least absolute shrinkage and selection operator (LASSO) regression coefficient for each factor | |
| --- | --- |
| **Gene** | **Coefficient** |
| HGF | 0.705936107 |
| IFN-γ | 0.40876806 |
| IL-2 | 0.188630291 |
| IL-7 | -0.288710005 |
| CA19-9 | 0.693714947 |
| CEA | 0.892478363 |

**Abbreviations:** HGF, hepatocyte growth factor; IFN, interferon; IL, interleukin; CA19-9, carbohydrate antigen 19-9; CEA, carcinoembryonic antigen.
